# Supplementary material for: Long-Term Safety and Efficacy of Teneligliptin in Elderly Patients with Type 2 Diabetes: Subgroup Analysis of a 3-Year Post-Marketing Surveillance in Japan
Source: PubMed Central journal article supplement — Adv Ther. 2020 Apr 22;37(5):2477–92. doi: 10.1007/s12325-020-01306-0 (PMC7467469; doi:10.1007/s12325-020-01306-0), 2020-04-22
Supplement: 12325_2020_1306_MOESM1_ESM.pdf [file 12325_2020_1306_MOESM1_ESM.pdf]

**Supplemental Fig. 1. Changes in body weight (a), triglycerides (b), HDL cholesterol (c) and LDL cholesterol (d) over time in patients aged <65, ≥65 to <75, or ≥75 years**

The graphs show mean ± standard deviation at each time-point  
 \*p < 0.05, \*\* p < 0.01, and \*\*\*p < 0.001 vs baseline (paired t test)

†Mean ± standard deviation

HDL, high-density lipoprotein; LDL, low-density lipoprotein

(a)

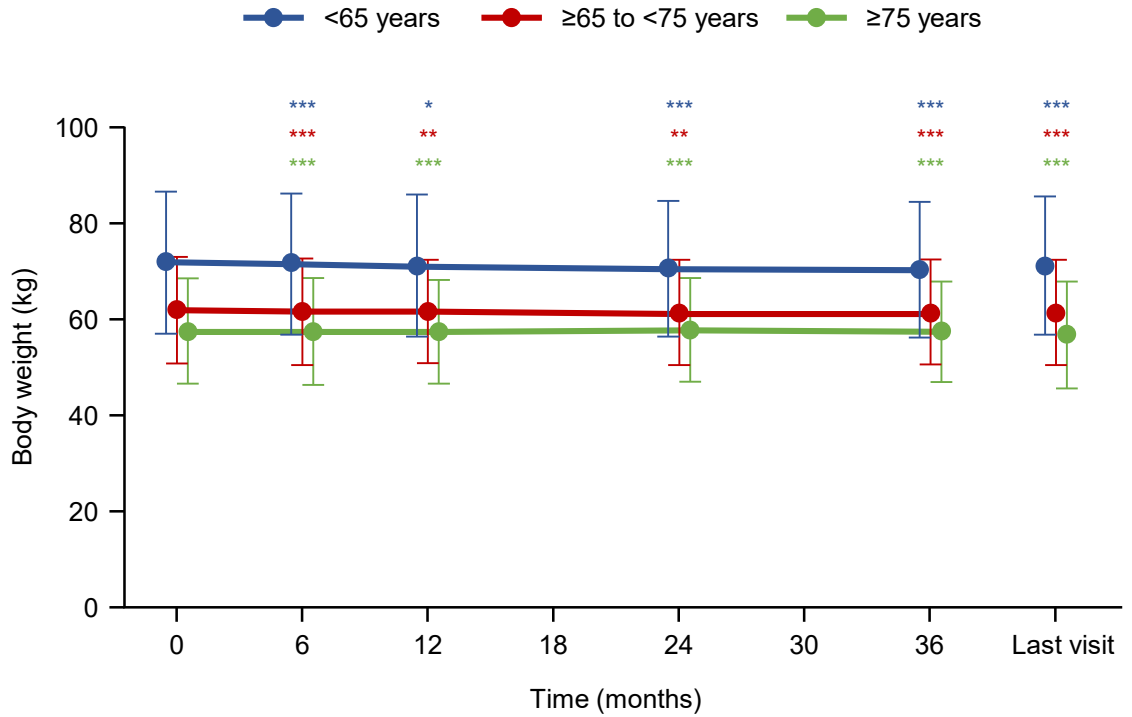

| Number of patients | 0    | 6    | 12   | 18 | 24   | 30 | 36   | Last visit |
|--------------------|------|------|------|----|------|----|------|------------|
| <65 years          | 2825 | 2172 | 1916 |    | 1621 |    | 1393 | 2825       |
| ≥65 to <75 years   | 2042 | 1539 | 1389 |    | 1187 |    | 1003 | 2042       |
| ≥75 years          | 1534 | 1170 | 991  |    | 792  |    | 643  | 1534       |

| At 3 years                              | <65 years                  | ≥65 to <75 years           | ≥75 years                 |
|-----------------------------------------|----------------------------|----------------------------|---------------------------|
| Change in body weight (kg) <sup>†</sup> | -0.75 ± 4.68<br>(n = 1393) | -0.73 ± 4.08<br>(n = 1003) | -1.30 ± 4.06<br>(n = 643) |

(b)

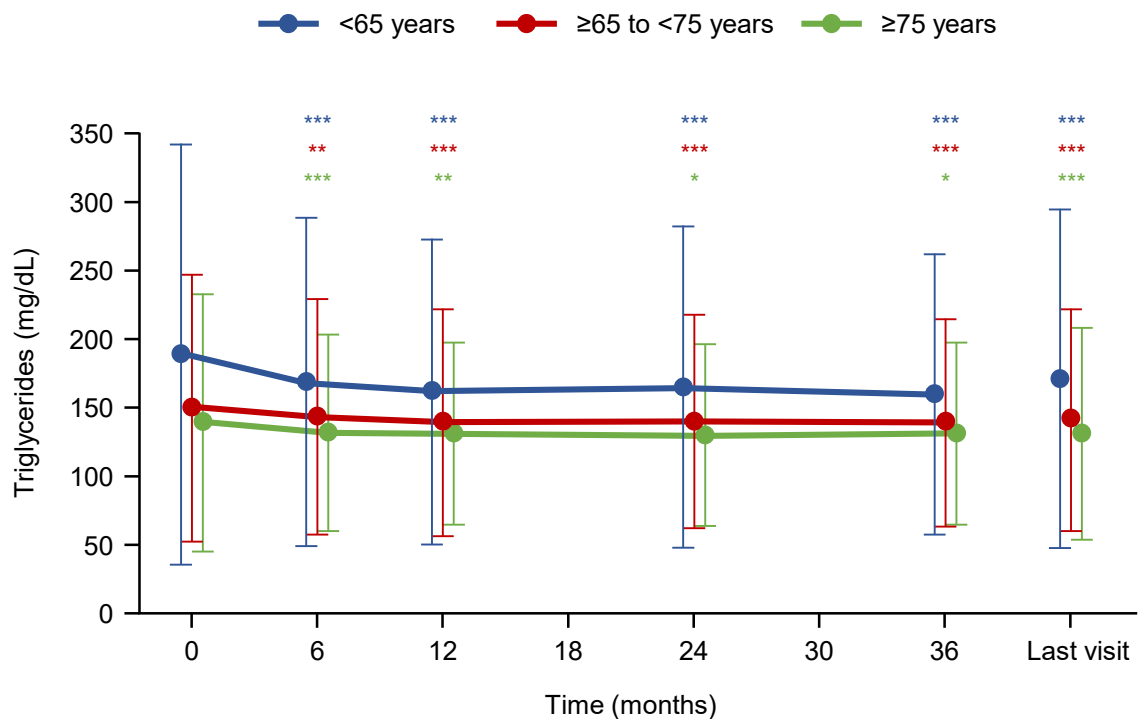

| Number of patients | 0    | 6    | 12   | 24   | 36   | Last visit |
|--------------------|------|------|------|------|------|------------|
| <65 years          | 3185 | 2441 | 2141 | 1752 | 1473 | 3185       |
| ≥65 to <75 years   | 2369 | 1830 | 1657 | 1370 | 1147 | 2369       |
| ≥75 years          | 1797 | 1401 | 1216 | 971  | 757  | 1797       |

| At 3 years                                   | <65 years                   | ≥65 to <75 years           | ≥75 years                |
|----------------------------------------------|-----------------------------|----------------------------|--------------------------|
| Change in triglycerides (mg/dL) <sup>†</sup> | -21.4 ± 133.7<br>(n = 1473) | -12.7 ± 99.0<br>(n = 1147) | -6.5 ± 78.7<br>(n = 757) |

(c)

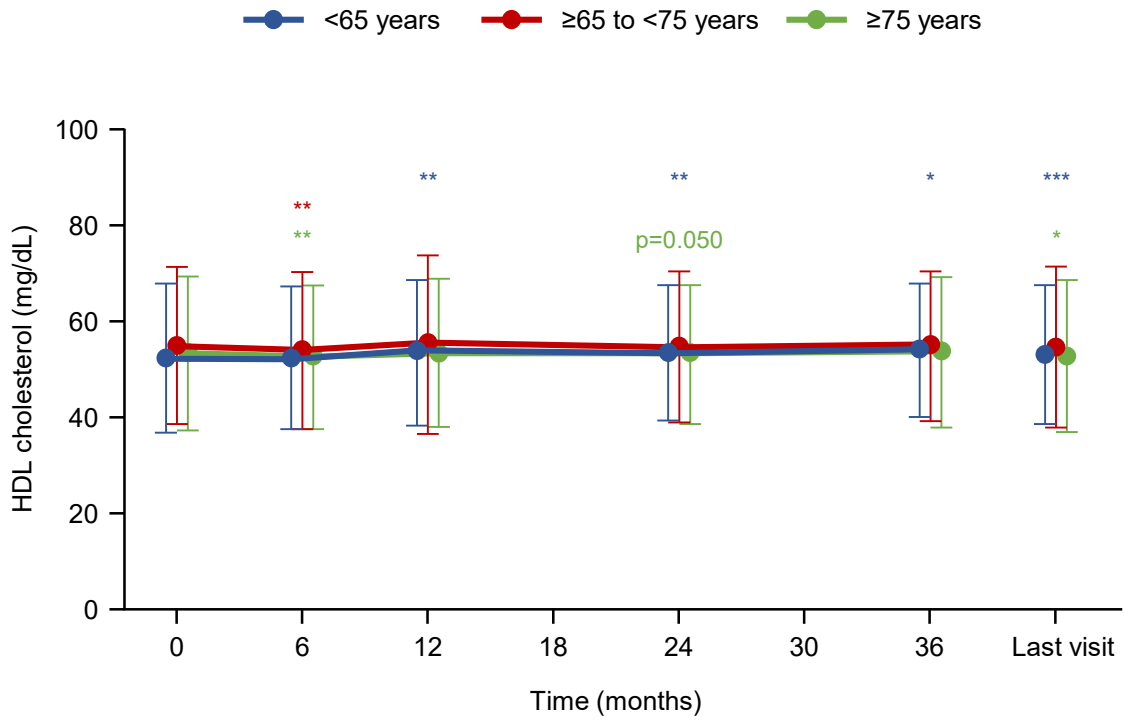

| Number of patients | 0    | 6    | 12   | 24   | 36   | Last visit |
|--------------------|------|------|------|------|------|------------|
| <65 years          | 2971 | 2266 | 1979 | 1595 | 1352 | 2971       |
| ≥65 to <75 years   | 2236 | 1722 | 1552 | 1289 | 1074 | 2236       |
| ≥75 years          | 1700 | 1316 | 1128 | 898  | 688  | 1700       |

| At 3 years                                     | <65 years                | ≥65 to <75 years          | ≥75 years               |
|------------------------------------------------|--------------------------|---------------------------|-------------------------|
| Change in HDL cholesterol (mg/dL) <sup>†</sup> | 0.8 ± 14.1<br>(n = 1352) | -0.2 ± 13.2<br>(n = 1074) | 0.0 ± 12.1<br>(n = 688) |

(d)

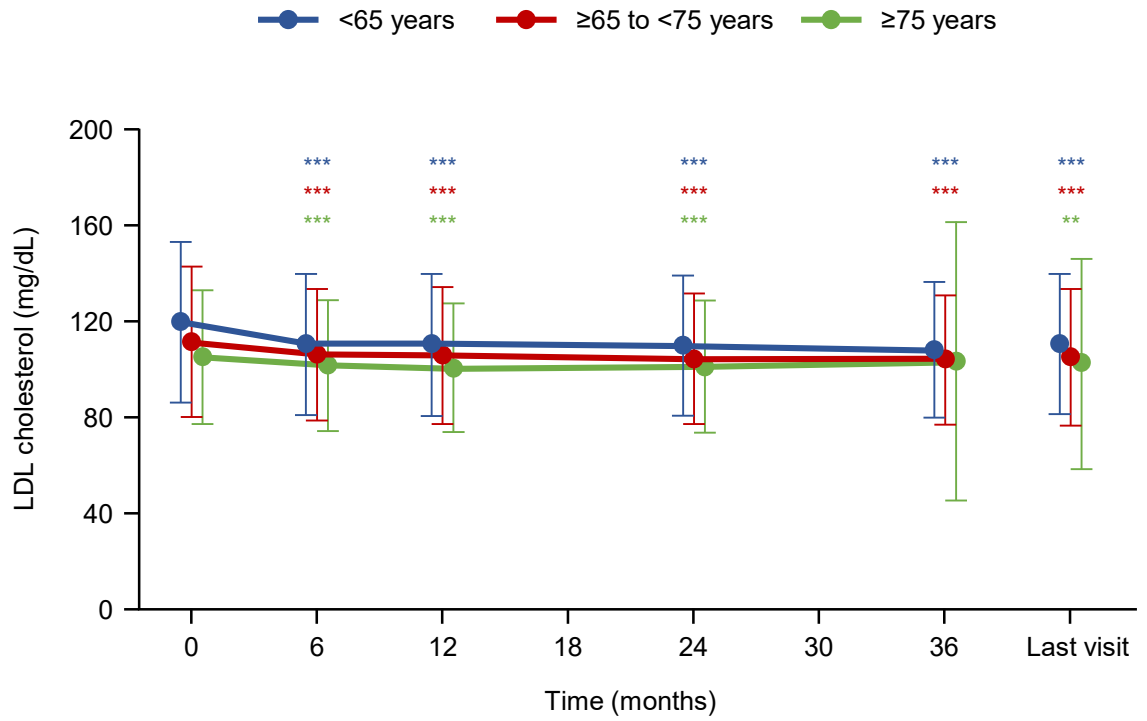

| Number of patients | 0    | 6    | 12   | 24   | 36   | Last visit |
|--------------------|------|------|------|------|------|------------|
| <65 years          | 2799 | 2108 | 1848 | 1527 | 1306 | 2799       |
| ≥65 to <75 years   | 2129 | 1619 | 1487 | 1235 | 1032 | 2129       |
| ≥75 years          | 1625 | 1246 | 1087 | 870  | 671  | 1625       |

| At 3 years                                     | <65 years                 | ≥65 to <75 years          | ≥75 years                |
|------------------------------------------------|---------------------------|---------------------------|--------------------------|
| Change in LDL cholesterol (mg/dL) <sup>†</sup> | -9.7 ± 32.3<br>(n = 1306) | -6.3 ± 28.4<br>(n = 1032) | -1.9 ± 60.2<br>(n = 671) |
