# Supplementary material for: Long-Term Safety and Efficacy of Teneligliptin in Elderly Patients with Type 2 Diabetes: Subgroup Analysis of a 3-Year Post-Marketing Surveillance in Japan
Source: PubMed Central journal article supplement — Adv Ther. 2020 Apr 22;37(5):2477–92. doi: 10.1007/s12325-020-01306-0 (PMC7467469; doi:10.1007/s12325-020-01306-0), 2020-04-22
Supplement: 12325_2020_1306_MOESM2_ESM.pdf [file 12325_2020_1306_MOESM2_ESM.pdf]

**ORIGINAL ARTICLE**

**高齢 2 型糖尿病患者に対するテネリグリプチン長期投与の安全性と有効性：  
日本における 3 年間の市販後調査のサブグループ解析**

Takashi Kadowaki, Masakazu Haneda, Hiroshi Ito, Kazuyo Sasaki, and Yuka Yamada

## 抄録

**緒言：**テネリグリプチンは、日本では2型糖尿病（T2DM）の治療薬として2012年に承認されたジペプチジルペプチダーゼ-4阻害薬である。しかしながら、テネリグリプチンの臨床試験において、高齢患者の数は限られていた。そこで、高齢T2DM患者を対象にテネリグリプチンの安全性および有効性を検討することとした。

**方法：**2013年5月から2015年2月までの期間に日本でテネリグリプチンの投与を開始したT2DM患者を、3年間の市販後調査である「RUBY」に登録し、患者背景、治療内容、副作用（ADR）、臨床検査値などのデータを収集した。データの解析は、年齢で3つのサブグループ（65歳未満、65歳以上75歳未満または75歳以上）に層別して行った。最長で3年間にわたり、安全性はADRの発現割合で、有効性は血糖コントロール状態で評価した。

**結果：**ADRおよび重篤なADRは、それぞれ65歳未満群（4,596例）で3.35%および0.65%、65歳以上75歳未満群（3,371例）で4.42%および1.22%、75歳以上群（2,729例）で3.99%および1.69%に発現した。最も発現割合が高かったADRは、65歳以上75歳未満群および75歳以上群では胃腸障害であったが、これらのADRの発現割合に年齢依存的な増加はみられなかった。低血糖は65歳未満群の0.24%、65歳以上75歳未満群の0.56%、75歳以上群の0.29%の患者で発現した。ベースライン値で調整した3年時におけるグリコヘモグロビン（HbA1c）値の変化量（最小二乗平均）は、それぞれ $-0.66 \pm 0.02\%$ （2,177例）、 $-0.72 \pm 0.02\%$ （1,689例）および $-0.77 \pm 0.03\%$ （1,161例）であった。

**結論：**重篤なADRの発現割合は65歳未満の患者に比較して高齢患者で高かったが、ADRの発現割合には3群間で明らかな差はみられなかった。高齢患者において、添付文書に既に記載されているもの以外の新たな安全性および有効性に関する懸念は認められなかった。今回の結果は、実臨床での高齢T2DM患者の治療におけるテネリグリプチンの使用をサポートするものである。

**臨床試験登録** : Japic Clinical Trials Information 登録番号、Japic CTI-153047

**キーワード** : テネリグリプチン、実臨床、市販後調査、2型糖尿病、高齢患者、ジペプチジル  
ペプチダーゼ-4 阻害薬

## 平易な言葉による要約

テネリグリプチンは、2型糖尿病患者の血糖コントロールのために1日1回服用する経口薬である。テネリグリプチンの安全性と有効性は数多くの臨床試験で検討されているが、それらの試験では75歳以上の高齢患者の数が限られていた。日本では、テネリグリプチンの承認後、実臨床における安全性および有効性を検討するための市販後調査が開始された。そこで、テネリグリプチンの安全性および有効性が若年者と高齢者と異なるか否かを確認するため、市販後調査のデータを分析した。その結果、65歳未満、65歳以上75歳未満および75歳以上の3群で見ると、重篤な副作用の発現割合は65歳未満群と比べてより高齢な患者群で高かったが、副作用の発現割合には3つの年齢群で明らかな差はみられなかった。テネリグリプチンを用いた治療は、すべての年齢群において血糖値を低下させ、その低下した状態は多くの患者で3年間維持された。高齢患者において、添付文書に既に記載されているもの以外の新たな安全性および有効性に関する懸念は認められなかった。今回の結果は、実臨床での高齢2型糖尿病患者の治療におけるテネリグリプチンの使用をサポートするものである。

## 緒言

2型糖尿病（T2DM）が社会にもたらす影響は、世界的にも [1] 日本においても [2] 急速に拡大しつつある。高齢の糖尿病患者も、社会の高齢化により増加している [1-3]。高齢患者は、集中的な管理や複数の薬剤を必要とする臨床的に重大な併存疾患を有していることが多いため、糖尿病治療薬との薬物間相互作用のリスクが高まるなど、糖尿病の治療が困難となることもある。さらに、高齢患者では、腎機能障害や併存疾患が一因となり、有害事象（AE）や副作用（ADR）、特に低血糖のリスクが増大する可能性がある [4,5]。

日本では、ジペプチジルペプチダーゼ-4（DPP-4）阻害薬が T2DM の治療に広く用いられている [6]。アジア人および日本人の T2DM の病態生理は、非アジア人に比べて  $\beta$  細胞機能が低いこと、肥満が少ないこと、インスリン抵抗性が少ないことなどが特徴で、そのため臨床医は DPP-4 阻害薬を支持する傾向にある [7,8]。こうした要因および遺伝的素因や食生活の違いが、日本人患者において DPP-4 阻害薬の効果が高いことに寄与し、T2DM に対する使用を促進しているのかもしれない [8]。

DPP-4 阻害薬テネリグリプチンは、日本および韓国で T2DM 治療薬として承認されている [9-11]。日本では、20 mg 1 日 1 回投与から開始し、血糖降下作用が不十分な場合には 40 mg 1 日 1 回に増量することができる。また、透析例を含めた腎機能障害患者においては、用量調節は不要である [9-11]。単独療法 [12,13]、ならびに他の経口血糖降下薬またはインスリンとの併用療法 [14-19] について検討した臨床試験において、テネリグリプチンの有効性および優れた忍容性が示されている。

T2DM は長期にわたる治療が必要であるが、これまでのテネリグリプチンの臨床試験は 1 年間

に限られていた。また、日本でのほとんどの臨床試験では、20～75歳の患者が登録された。このため、高齢患者における長期投与のデータが不足している。市販後調査は、承認されて間もない薬剤の実臨床での有効性及び安全性を、臨床試験よりも長い期間にわたって評価することができ、臨床試験の対象となることが少ない高齢患者も含まれる [20]。

そこで、テネリグリプチンの実臨床における長期投与（3年間）での安全性および有効性の検討を目的として10,000例を超えるT2DM患者を対象とした市販後調査「RUBY ; ExploRing the long-term efficacy and safety including cardiovascular events in patients with type 2 diabetes treated by teneligliptin in the real-world」が実施された [21,22]。最近3年時点の結果が得られた [23]。同時に、65歳以上75歳未満および75歳以上の高齢患者におけるテネリグリプチン長期投与の安全性および有効性を評価する目的で解析を実施したので報告する。

## 方法

「RUBY」の調査デザインおよび結果は既に論文として報告されている [21-23]。既報に記載のとおり、「RUBY」は日本の厚生労働省に承認され、田辺三菱製薬株式会社により「医薬品の製造販売後の調査及び試験の実施の基準（GPSP）に関する省令」を遵守して実施された。本調査では、日常診療で収集され匿名化したデータを使用しており、市販後調査に関する日本の法令を遵守し、患者の同意は取得されていない。「RUBY」は日本医薬情報センターの臨床試験情報データベースに登録された（Japic CTI-153047）。

2013年5月から2015年2月までの期間にテネリグリプチンを初めて投与されたT2DM患者が処方医によって登録され、2018年8月まで最長3年間にわたり追跡された。すべての治療は、テネリグリプチンおよび併用療法を含め、添付文書 [10,11] や処方計画に則り、処方医の判断で行われた。テネリグリプチンの投与量は、処方医が20 mgで血糖降下作用が不十分と判断した場合、20 mg 1日1回から40 mg 1日1回に増量可とした。

データは電子報告書で収集し、2019年1月にデータベースを固定した [23]。グリコヘモグロビン（HbA1c）、空腹時血糖（FBG）および脂質などの臨床検査値データは、一定間隔で記録した。最長で3年間にわたり、安全性をADRの発現割合で、有効性をHbA1c、FBGなどの血糖コントロール状態で評価した。

安全性はICH国際医薬用語集日本語版（MedDRA/J）version 21.1を用いて分類したADRの発現割合で評価した。ADRの定義は、既報のとおりテネリグリプチンとの因果関係が否定できない、すなわち因果関係あり、または因果関係不明と判定されたAEとした [21-23]。注目すべきADRは、低血糖に関連するもの、皮膚および皮下組織障害（類天疱瘡を含む）、胃腸障害

(肺炎および腸閉塞を含む)、肝機能障害、腎機能障害、心血管系イベントおよび悪性腫瘍とした [22,23]。重篤な低血糖は、血糖値 $\leq$ 50 mg/dL または処方医の診断によると定義した。心血管系および悪性腫瘍関連 AE の発現割合も評価した。

データの解析は、患者の年齢により 3 つのサブグループ (65 歳未満、65 歳以上 75 歳未満、75 歳以上) に分けて行った。安全性解析集団は安全性を評価されたすべての登録患者とし、有効性解析集団は有効性を評価された全患者とした。連続データは記述統計量として要約し、非連続データは各カテゴリでの例数および割合で要約した。注目すべき ADR または AE について、発現率のリスク比および 95%信頼区間 (CI) を年齢群別に算出し、発現割合の違いの有無を評価した。連続変数のベースラインからの変化量是对応のある  $t$  検定を用いて比較した。 $p$  値が 0.05 未満である場合を有意差ありとみなした。HbA1c の変化量は、ベースラインの値を共変量とした分散分析により最小二乗 (LS) 平均値および標準誤差 (SE) として評価した。欠測データは、最終時点において last observation carried forward (LOCF) 法により補完した。すべての統計解析には SAS 統計ソフトウェアの version 9.1.3 以降を使用した。



## 結果

### 患者

既報のとおり [23]、11,677 例が登録され、うち 10,696 例が安全性解析対象症例、10,249 例が有効性解析対象症例となった。安全性解析対象症例（10,696 例）の年齢別サブグループの内訳は、65 歳未満群が 4,596 例（43.0%）、65 歳以上 75 歳未満群が 3,371 例（31.5%）、75 歳以上群が 2,729 例（25.5%）であった。3 つの年齢群でのベースライン時の患者背景については、特に男女の割合、糖尿病の罹病期間、糖尿病合併症を有する患者の割合、その他の併存疾患を有する患者の割合、運動療法中の患者の割合、および推算糸球体濾過量について 65 歳未満群と高齢患者群とで違いがみられた（Table 1）。HbA1c および FBG は年齢が若い群の方が高い傾向がみられた。

### テネリグリプチンおよび併用療法

テネリグリプチンの投与期間中央値は、いずれの年齢群も 1,096 日（3 年）であり、1 日平均投与量は 20.34~20.50 mg であった（Table 2）。65 歳未満群の 34.4%、65 歳以上 75 歳未満群の 31.4%、75 歳以上群の 38.1%が、来院せず、転院、無効/効果不十分などを主な理由としてテネリグリプチンの投与を中止した（Table 2）。テネリグリプチンを 40 mg 1 日 1 回に増量した患者は 65 歳未満群で 100 例（2.2%）、65 歳以上 75 歳未満群で 71 例（2.1%）、75 歳以上群で 49 例（1.8%）であった。初回増量までの期間（中央値）は、65 歳未満群で 182 日、65 歳以上 75 歳未満群で 226 日、75 歳以上群で 141 日であった。増量期間（中央値）は、それぞれ 645 日、585 日、および 552 日であった。

テネリグリプチンは、患者の約半数で T2DM に対する単独療法として投与されていた。すべての年齢群において、主な併用薬はスルホニルウレア薬、ビグアイドおよび  $\alpha$ -グルコシダーゼ

阻害薬であった。メトホルミンおよび SGLT2 阻害薬を併用していた患者は、65 歳未満群と比較して 65 歳以上 75 歳未満群および 75 歳以上群で少なかった。高血圧治療薬の併用割合は 65 歳未満群に比較して高齢患者群で高く、65 歳未満群で 41.5%、65 歳以上 75 歳未満群で 53.6%、75 歳以上群で 60.8%であった。

## 安全性

ADR は、65 歳未満群では 154 例（3.35%）で 176 件、65 歳以上 75 歳未満群では 149 例（4.42%）で 184 件、75 歳以上群では 109 例（3.99%）で 129 件が認められ、発現割合は各年齢群で類似していた（Table 3）。重篤な ADR の発現割合は 65 歳未満群に比較して高齢患者群で高くなる傾向にあり、65 歳未満群では 30 例（0.65%）で 31 件、65 歳以上 75 歳未満群では 41 例（1.22%）で 46 件、75 歳以上群では 46 例（1.69%）で 56 件であった。

40 mg へ増量後の ADR は 13 例で 16 件が報告され、その内訳は 65 歳未満群が 100 例中 2 例（2.00%）で 2 件、65 歳以上 75 歳未満群が 71 例中 6 例（8.45%）で 7 件、75 歳以上群が 49 例中 5 例（10.20%）で 7 件であった。65 歳以上 75 歳未満群の 7 件中 6 件、および 75 歳以上群の 7 件中 4 件の ADR は、テネリグリプチンとの因果関係は不明と報告された。他の 4 件の ADR はテネリグリプチンとの因果関係が否定できないと判定され、うち 2 件は併存疾患または併用薬などその他の因子も関与している可能性があるとして処方医が報告した。重篤な ADR は、65 歳未満群では 1 例で 1 件（肺の悪性新生物）、65 歳以上 75 歳未満群では 0 件、75 歳以上群では 2 例で 3 件みられた（1 例で肝機能異常と膵癌、他の 1 例で類天疱瘡）。重篤な ADR の 4 件すべてで因果関係は不明であった。

Table 3 に示すように、低血糖関連 ADR の発現割合は 65 歳以上 75 歳未満群では 65 歳未満群より高く (0.56% vs 0.24%)、100 人年あたりの発現頻度は 0.23 vs 0.10 であった。一方、75 歳以上群の低血糖関連 ADR の発現割合は 0.29% (100 人年あたり 0.13) であり、65 歳未満群と比較して明らかな差はみられなかった。重篤な低血糖関連 ADR は 65 歳以上 75 歳未満群では 3 例、75 歳以上群では 3 例報告された。これらは全例、スルホニルウレア薬またはインスリンを使用していた。

皮膚および皮下組織障害関連 ADR の発現割合に 3 群間で有意な差はみられなかった (Table 3)。しかしながら、類天疱瘡は 65 歳未満群では 1 例 (0.02%)、75 歳以上群では 4 例 (0.15%) 報告された。

胃腸障害は高齢患者において最も発現割合が高い注目すべき ADR であった (Table 3)。胃腸障害に関連する ADR の発現割合に年齢依存的な増加はみられなかったが、重篤な症例は高齢患者群でより多い傾向があり、65 歳未満群では 3 例 (0.07%)、65 歳以上 75 歳未満群では 4 例 (0.12%)、75 歳以上群では 5 例 (0.18%) に発現した。胃腸障害の重篤な ADR は、65 歳以上 75 歳未満群では腸閉塞 (イレウス) (2 例)、兎径ヘルニア (1 例)、急性膵炎 (1 例) であり、75 歳以上群では腸閉塞 (イレウス) (2 例)、出血性胃潰瘍 (1 例)、腸管虚血 (1 例)、大腸穿孔 (1 例) であった。

肝機能または腎機能に関連する ADR 全体あるいは重篤な ADR の発現割合に年齢依存的な増加はみられなかった (Table 3)。

心血管系および悪性腫瘍関連 AE の発現割合は、65 歳未満群と比較して 65 歳以上 75 歳未満群

および 75 歳以上群で有意に高かったが、ADR の発現割合については年齢間の有意差はみられなかった (Table 3) 。 AE として報告された膵癌は、65 歳以上 75 歳未満群では 6 例 (0.18%) 、 75 歳以上群では 8 例 (0.29%) であった。

注目すべき ADR 以外としては、浮動性めまいが、65 歳以上 75 歳未満群および 75 歳以上群において、いずれも 0.15% の患者で発現した (Table 3) 。

### HbA1c および FBG

HbA1c は、いずれの年齢群でも 6 カ月時で有意に低下し、この低下は 3 年後まで維持された (Fig. 1) 。 ベースラインの値で調整した 3 年時における HbA1c 変化量 (最小二乗平均値  $\pm$  SE) は、65 歳未満群で  $-0.66 \pm 0.02\%$ 、65 歳以上 75 歳未満群で  $-0.72 \pm 0.02\%$ 、75 歳以上群で  $-0.77 \pm 0.03\%$  であり、3 つの年齢群の間の差はわずかではあったが、有意な差が認められた ( $p < 0.001$ )。 3 年時における HbA1c 値 (平均  $\pm$  標準偏差) は、65 歳未満群で  $7.10 \pm 1.01\%$ 、65 歳以上 75 歳未満群で  $6.92 \pm 0.83\%$ 、75 歳以上群で  $6.81 \pm 0.89\%$  であった。 ベースラインの HbA1c 値が 7% 以上で、かつ 3 年時点の HbA1c 値データを有する患者のうち、3 年時点で HbA1c 値  $< 7\%$  を達成した患者は、いずれの群もほぼ半数であった (42.6% [701/1,644 例]、50.0% [554/1,109 例]、52.0% [357/687 例] ) 。

FBG は、HbA1c と同様の経時変化を示し、各時点でベースラインからの有意な低下がみられた (Fig. 2) 。 3 年時点での FBG の平均変化量  $\pm$  標準偏差は、3 つの年齢群間で明らかな違いはなかった (それぞれ  $-22.3 \pm 53.2$  mg/dL、 $-17.9 \pm 43.0$  mg/dL および  $-17.6 \pm 45.1$  mg/dL) 。

## 体重および脂質

Supplemental Fig. 1 に各時点における各群の体重および脂質の変化量を示す。体重は、いずれの年齢群でもわずかではあるが3年時に有意な低下がみられた (Supplemental Fig. 1a)。観察期間中の脂質については、各年齢群とも中性脂肪および低密度リポ蛋白コレステロール値のわずかな低下がみられたが、高密度リポ蛋白コレステロール値についてはいずれの年齢群においても明らかな変化はなかった (Supplemental Fig. 1b-d)。

## 考察

高齢患者におけるテネリグリプチン長期投与時の安全性および有効性に関する知見を得る目的で、「RUBY」のサブグループ解析を実施した。注目すべきことに、重篤な ADR の発現割合は、65 歳未満群に比べて高齢患者群（65 歳以上 75 歳未満群および 75 歳以上群）で高かったが、ADR 全体の発現割合に年齢依存性は認められず、各年齢群とも約 3~4%であった。言うまでもないが、高齢患者では重篤な ADR の発現リスクがあることを認識することが重要である。テネリグリプチンを 40 mg に増量した患者における ADR 発現割合は、高齢患者群で数値的に高かったが、それらの患者における ADR の多くは因果関係が不明であった。

「RUBY」の中間解析において、テネリグリプチンを投与した高齢患者における安全性と 2 年までの有効性を報告した[21]。今回の 3 年間の解析結果は、患者背景、ADR の発現割合と種類、および有効性に関してそれら既報とおおむね一致する。今回の結果は、長期間にわたる安定した血糖コントロールとともにテネリグリプチンの安全性プロファイルが 3 年間にわたる治療期間中維持されることを示しており、中間解析で得られた結果と矛盾しないものである。

日本で実施されたアナグリプチンの実臨床における 2 年間の市販後調査では [24]、ADR 発現割合は 65 歳未満の患者で 6.9%（146/2,110 例）、65 歳以上 75 歳未満の患者で 8.2%

（117/1,424 例）、75 歳以上の患者で 10.2%（106/1,039 例）であった。また、リナグリプチンの市販後調査における 78 週時の中間解析では [25,26]、単独療法時の ADR 発現割合は 65 歳未満の患者で 8.58%（81/944 例）、65 歳以上の患者で 12.28%（172/1,401 例）、併用療法時はそれぞれ 9.01%（134/1,488 例）、9.76%（234/2,398 例）であった。最近、この市販後調査の最長 156 週間のデータに基づく最終結果が、リナグリプチンの単独投与を開始した患者に関して報告されており、ADR 発現割合は 65 歳未満の患者で 8.9%（80/902 例）、65 歳以上の

患者で 12.0% (160/1,333 例) であった [27]。一般的に、高齢患者では、腎機能や肝機能の障害、併存疾患、多剤併用などの様々な理由により、重篤や非重篤な AE を発現するリスクが高くなる [4, 5, 28]。テネリグリプチンの添付文書 [10,11] に記載されているとおり、患者の状態を十分観察しながら慎重に投与することが重要である。

注目すべき各 ADR の発現割合については年齢依存的な増加はみられなかったが、高齢患者、特に 75 歳以上の患者で、重篤な ADR の発現割合が高い傾向がみられた。

低血糖関連 ADR は、3 つの年齢群のうち 65 歳以上 75 歳未満群で最も発現割合が高く、65 歳未満群の発現頻度に対する比は 2.27 であった。意外なことに、75 歳以上群における低血糖関連 ADR の発現割合は 65 歳未満群と同様であった。その要因としては、75 歳以上の患者は無自覚性低血糖を発現していた可能性が高いこと、あるいは高齢患者の治療にあたる医師が併用薬の処方に慎重であったことが考えられる。重篤な低血糖関連 ADR を発現した患者は全員、低血糖のリスク増加と関連すると考えられているインスリンまたはスルホニルウレア薬を、テネリグリプチンと併用していた。低血糖は QOL の低下 [29,30] や骨折リスクの増加 [31] など有害な転帰に影響を与え、重大な低血糖は、死亡 [32]、心血管疾患 [32,33]、および認知症 [34,35] の危険因子との見方が確立している。したがって、高齢患者に対しては低血糖を避けるため医師は特に注意を払う必要がある。

DPP-4 阻害薬と類天疱瘡の関連が報告されている [36,37]。これにより、日本ではテネリグリプチンも含めて、DPP-4 阻害薬の添付文書が改訂され、類天疱瘡への注意喚起がなされた。本調査において、類天疱瘡を発現した患者の大部分は 75 歳以上の高齢者であった。疫学調査では、類天疱瘡は 70 歳代後半以上の高齢者で頻度が高いと報告されており [38]、「RUBY」

で得られた知見はこれらの結果と一致している。

胃腸障害は最も発現割合が高い種類の ADR であったが、その発現はいずれの年齢群でも 1%未満であった。胃腸障害には明らかな年齢依存性は認められなかったが、重篤な胃腸障害の ADR の発現割合は高齢患者群で高い傾向がみられた。

また、心血管系および悪性腫瘍関連 AE の発現割合は年齢とともに増加する傾向がみられたが、ADR にはこのような傾向はみられなかった。高齢患者において心血管関連 AE の発現割合が高い理由としては、テネリグリプチン投与開始時の心疾患や腎機能障害に関する併存疾患の有病率が高いことが考えられる [39]。膵癌は「RUBY」で最も頻度が高かった悪性腫瘍関連 AE であり [23]、年齢とともに発現割合が増加する傾向にあった。膵癌は高齢および糖尿病と関連することが報告されている [40,41]。既報のとおり [23]、心血管関連 AE および膵癌の発現割合は疫学調査と同程度であるか、あるいはそれより低かった。したがって、テネリグリプチンの投与後にこれらの AE 発現割合が増加したのは加齢によるものと考えられた。

注目すべき ADR 以外に多かった ADR として、浮動性めまいが 65 歳以上 75 歳未満群および 75 歳以上群のそれぞれ 0.15%に認められたが、過去の臨床試験と同程度の発現割合であった [10]。したがって、高齢者において、テネリグリプチンの添付文書に既に記載されているものの以外の新たな安全性に関する懸念は見出されなかった。

テネリグリプチンの有効性は各年齢群における HbA1c および FBG の経時変化で評価した。血糖コントロールの改善は治療開始後 6 カ月以内に認められ、3 年間にわたり維持された。3 つの年齢群の間で、3 年時における HbA1c または FBG の減少に著しいまたは臨床的に意義のあ



る違いは認められなかった。複数の 24 週または 52 週の臨床試験により、テネリグリプチンや他の DPP-4 阻害薬は、高齢患者における単独療法、あるいは他の糖尿病治療薬との併用療法で有効であることが明らかになっている [42-44]。「RUBY」の結果は、これら過去の試験成績と一致している。また、今回得られた結果は、実臨床での高齢 T2DM 患者の治療においてテネリグリプチンの長期投与が有効であることを示している。

テネリグリプチン投与開始後 3 年時点において、すべての年齢群で体重の変化はほとんどみられなかった。高齢の糖尿病患者は、サルコペニアをきたしやすい [4]。サルコペニアは転倒や骨折、死亡のリスクを高め、QOL を損なうため [45]、その予防は重要であるが、他の DPP-4 阻害薬と同様 [46]、テネリグリプチンの体重に対する影響はニュートラルと考えられる。

### **本調査の限界**

本調査で考えられる言及すべき限界としては既報の通り [23]、特に、対照群がないこと、併用薬変更や生活習慣の変化、報告バイアスの可能性、多くの患者で臨床検査データが得られなかったことなどが挙げられる。今回のデータを解釈する際は、これらの限界を考慮する必要がある。また、本報告に固有の他の限界としては、各年齢群の患者数が不均衡であることに起因するバイアスの可能性が考えられる。

## 結論

本調査により高齢患者におけるテネリグリプチンの安全性および有効性が確認された。高齢化社会であることや高齢 T2DM 患者が増加傾向にあることを考慮すると、今回得られた結果は臨床的に重要なものである。高齢者において、テネリグリプチンの添付文書に既に記載されているもの以外の新たな安全性および有効性に関する懸念は認められなかった。今回の結果は、実臨床での高齢 T2DM 患者の治療におけるテネリグリプチンの使用をサポートするものである。
